# Supplementary material for: Identification of Evening Complex Associated Proteins in Arabidopsis by Affinity Purification and Mass Spectrometry
Source: PubMed Central journal article supplement (PMC4762519; doi:10.1074/mcp.m115.054064), 2015-11-06
Supplement: 10.1074_M115.054064_mcp.M115.054064-1.pdf [file 10.1074_M115.054064_mcp.M115.054064-1.pdf]

Supplemental legends and Data for:

Identification of evening complex associated proteins in *Arabidopsis* by affinity purification and mass spectrometry.

**He Huang<sup>1</sup>, Sophie Alvarez<sup>1‡</sup>, Rebecca Bindbeutel<sup>1</sup>, Zhouxin Shen<sup>2</sup>, Michael J. Naldrett<sup>1‡</sup>, Bradley S. Evans<sup>1</sup>, Steven P. Briggs<sup>2</sup>, Leslie M. Hicks<sup>3</sup>, Steve A. Kay<sup>4\*</sup>, and Dmitri A. Nusinow<sup>1\*</sup>**

<sup>1</sup> Donald Danforth Plant Science Center, 975 N. Warson Road, St. Louis, MO, 63132, USA

<sup>2</sup> University of California San Diego, Division of Biological Sciences, Cell and Developmental Biology Section, 9500 Gilman Drive, La Jolla, CA 92093-0116, USA.

<sup>3</sup> The University of North Carolina at Chapel Hill, Department of Chemistry, Chapel Hill, NC 27599, USA

<sup>4</sup> University of Southern California, Molecular and Computational Biology Section, Los Angeles, CA 90089, USA.

Figure S1. Characterization of ELF4::ELF4-HFC complementation lines. A) Multiple lines independent ELF4::ELF4-HFC transgenic lines complement the *elf4-3* loss of function allele and restore *CAB::LUC* rhythms. Seedlings were entrained in 12 hours light and 12 hours dark conditions for 6 days before transferring to constant light. n= 16, error bars= 95% confidence interval. B) Scatter plots of average period length of ELF4::ELF4-HFC complementation lines. Measurements were repeated twice in independent biological experiments with similar results. C) Relative amplitude error (RAE) plots of complementation lines. The line at RAE =0.6 represents the upper bounds of values that are considered reliably rhythmic. D) ELF4::ELF4-HFC complementation lines rescue hypocotyl elongation defects of *elf4-3* mutants. Scatter plots show of hypocotyl length of the independent insertion lines. N≥20, line is the mean, and error is 95% confidence interval. Measurements were repeated twice in independent biological experiments with similar results.

Figure S2. Characterization of circadian expression patterns of identified co-interacting proteins. Data was derived from a circadian time course analysis in the *Col* background (110). The genes identified by AP-MS were determined to have a circadian expression pattern if their expression matched a cosine wave with an adjusted p value of  $\leq 0.05$ , and were graphed. Black indicates genes common to both ELF4 and ELF3 pull downs (any genetic background), blue indicates genes specific to ELF4 pulldowns (any genetic background), and red are specific to ELF3 pulldowns (any genetic background).

Figure S3. Characterization of the ELF4::ELF4-HFC *elf3-1 elf4-3* lines. A) ELF4::ELF4-HFC *elf3-1 elf4-3* is arrhythmic. Comparison of wild type, *elf4-3 elf3-1*, ELF4::ELF4-HFC-51 *elf4-3*, and ELF4::ELF4-HFC *elf3-1 elf4-3* in constant light conditions. Seedlings were entrained in 12 hours light and 12 hours dark conditions for 6 days before transferring to constant light. n= 16, error bars= s.e.m. B) RAE plots of wild type, *elf4-3 elf3-1*, ELF4::ELF4-HFC-51 *elf4-3*, and ELF4::ELF4-HFC *elf3-1 elf4-3* lines. The line at RAE =0.6 represents the upper bounds of values that are considered reliably rhythmic. C) Comparison of hypocotyl elongation phenotypes of wild type, *elf4-3 elf3-1*, ELF4::ELF4-HFC-51 *elf4-3*, and ELF4::ELF4-HFC *elf3-1 elf4-3* lines. N=20. Measurements were repeated twice with similar results. Note that *wild type*, ELF4::ELF4-HFC-51 *elf4-3*, and *elf4-3* mutant data for all subpanels are shared with Figure 1 and S1, and were re-graphed for comparison.

Figure S4. Characterization of ELF3::ELF3-HFC complementation lines. A) Multiple lines independent ELF3::ELF3-HFC transgenic lines complement the *elf3-2* loss of function allele and restore *CCA1::LUC* rhythms. Seedlings were entrained in 12 hours light and 12 hours dark conditions for 6 days before transferring to constant light. n= 8, error = 95% confidence interval. Measurements were repeated twice in independent biological experiments with similar results. B) RAE plots of ELF3::ELF3-HFC complementation lines. The line at RAE =0.6 represents the upper bounds of values that are considered reliably rhythmic. C) Scatter plots of the period length of wild type, ELF3::ELF3-HFC #1 *elf3-2*,

ELF3::ELF3-HFC #3 *elf3-2*, and ELF3::ELF3-HFC #15 *elf3-2*. Line is at mean, n= 8, error = 95% confidence interval. Measurements were repeated twice in independent biological experiments with similar results. D) ELF3::ELF3-HFC complementation lines also rescue hypocotyl elongation defects of *elf3-2* mutants. Scatter plots show the average and range of hypocotyl length of the independent insertion lines. N= 20. Measurements were repeated twice in independent biological experiments with similar results.

Figure S5. Characterization of the ELF3::ELF3-HFC #3 *elf3-2 elf4-2* lines. A) ELF3::ELF3-HFC #3 *elf3-2 elf4-2* has dampened rhythms. Comparison of wild type, *elf4-2*, ELF3::ELF3-HFC #3 *elf3-2*, and ELF3::ELF3-HFC #3 *elf3-2 elf4-2* in constant light conditions. Seedlings were entrained in 12 hours light and 12 hours dark conditions for 6 days before transferring to constant light. error = 95% confidence interval. Measurements were repeated twice in independent biological experiments with similar results. B) RAE plots of wild type, *elf4-2*, ELF3::ELF3-HFC #3 *elf3-2*, and ELF3::ELF3-HFC #3 *elf3-2 elf4-2*. The line at RAE =0.6 represents the upper bounds of values that are considered reliably rhythmic. Measurements were repeated twice in independent biological experiments with similar results. C) Scatter plots of the period length of wild type, *elf4-2*, ELF3::ELF3-HFC #3 *elf3-2*, and ELF3::ELF3-HFC #3 *elf3-2 elf4-2* lines. Line is at mean, n= 8, error = 95% confidence interval. Measurements were repeated twice in independent biological experiments with similar results. D) Characterization ELF3::ELF3-HFC #3 *elf4-2* lines hypocotyl elongation phenotypes. Scatter plots show the average and range of hypocotyl length of the independent insertion lines. N= 20. Measurements were repeated twice in independent biological experiments with similar results. Note that *wild type*, ELF3::ELF3-HFC #3 *elf3-2* and *elf3-2* mutant data in all subpanels are shared with Figure S4, and re-graphed for comparison.

Figure S6. Characterization of the circadian rhythmicity of the *mlk* lines. A) Wild type compared to the *mlk* single mutants. Seedlings were entrained in 12 hours light and 12 hours dark conditions for 6 days before transferring to constant red light. N=15-16, error = 95% confidence interval. Measurements were

repeated twice with similar results. B) RAE plots of wild type and *mlk* single mutants. The line at RAE =0.5 represents the upper bounds of values that are considered reliably rhythmic. Measurements were repeated twice with similar results. C) Wild type compared to the *mlk* double mutants. Seedlings were entrained in 12 hours light and 12 hours dark conditions for 6 days before transferring to constant red light. N=15-16, error = 95% confidence interval. Measurements were repeated twice in independent biological experiments with similar results. D) RAE plots of wild type and *mlk* double mutants. The line at RAE =0.6 represents the upper bounds of values that are considered reliably rhythmic. Measurements were repeated twice in independent biological experiments with similar results. E) Wild type compared to the *mlk* triple mutants. Seedlings were entrained in 12 hours light and 12 hours dark conditions for 6 days before transferring to constant red light. N=15-16, error = 95% confidence interval. Measurements were repeated twice with similar results. F) RAE plots of wild type and *mlk* triple mutants. The line at RAE =0.6 represents the upper bounds of values that are considered reliably rhythmic. Measurements were repeated twice in independent biological experiments with similar results. Note that the data for *wild type* are shared among all panels for comparison.

**Table S1. Gene ontology enrichment of proteins that co-precipitate with ELF4-HFC in the elf4-3 background. AGRIGO website (<http://bioinfo.cau.edu.cn/agriGO/>) output for queried Arabidopsis locus IDs that co-precipitate with ELF4::ELF4-HFC #51.**

| GO term    | Ontology | Description                                                                         | Number in input list | Number in Background | p-value  | FDR      |
|------------|----------|-------------------------------------------------------------------------------------|----------------------|----------------------|----------|----------|
| GO:0048511 | Process  | rhythmic process                                                                    | 6                    | 75                   | 9.80E-13 | 1.10E-10 |
| GO:0007623 | Process  | circadian rhythm                                                                    | 6                    | 75                   | 9.80E-13 | 1.10E-10 |
| GO:0010017 | Process  | red or far-red light signaling pathway                                              | 5                    | 41                   | 1.30E-11 | 9.80E-10 |
| GO:0050789 | Process  | regulation of biological process                                                    | 13                   | 3697                 | 1.30E-10 | 7.10E-09 |
| GO:0009639 | Process  | response to red or far red light                                                    | 6                    | 210                  | 3.80E-10 | 1.70E-08 |
| GO:0065007 | Process  | biological regulation                                                               | 13                   | 4188                 | 6.00E-10 | 2.30E-08 |
| GO:0009416 | Process  | response to light stimulus                                                          | 7                    | 596                  | 4.30E-09 | 1.40E-07 |
| GO:0009314 | Process  | response to radiation                                                               | 7                    | 613                  | 5.20E-09 | 1.50E-07 |
| GO:0050794 | Process  | regulation of cellular process                                                      | 11                   | 3375                 | 2.20E-08 | 5.50E-07 |
| GO:0051716 | Process  | cellular response to stimulus                                                       | 7                    | 840                  | 4.40E-08 | 1.00E-06 |
| GO:0007242 | Process  | intracellular signaling cascade                                                     | 6                    | 659                  | 3.00E-07 | 6.20E-06 |
| GO:0009605 | Process  | response to external stimulus                                                       | 5                    | 429                  | 1.10E-06 | 2.00E-05 |
| GO:0009628 | Process  | response to abiotic stimulus                                                        | 7                    | 1471                 | 1.90E-06 | 3.30E-05 |
| GO:0019219 | Process  | regulation of nucleobase, nucleoside, nucleotide and nucleic acid metabolic process | 7                    | 1847                 | 8.50E-06 | 0.00012  |
| GO:0031326 | Process  | regulation of cellular biosynthetic process                                         | 7                    | 1881                 | 9.60E-06 | 0.00012  |
| GO:0009889 | Process  | regulation of biosynthetic process                                                  | 7                    | 1881                 | 9.60E-06 | 0.00012  |
| GO:0051171 | Process  | regulation of nitrogen compound metabolic process                                   | 7                    | 1888                 | 9.80E-06 | 0.00012  |
| GO:0010556 | Process  | regulation of macromolecule biosynthetic process                                    | 7                    | 1843                 | 8.40E-06 | 0.00012  |
| GO:0045449 | Process  | regulation of transcription                                                         | 7                    | 1802                 | 7.30E-06 | 0.00012  |
| GO:0007165 | Process  | signal transduction                                                                 | 6                    | 1228                 | 1.10E-05 | 0.00012  |
| GO:0006350 | Process  | transcription                                                                       | 7                    | 1923                 | 1.10E-05 | 0.00012  |
| GO:0009791 | Process  | post-embryonic development                                                          | 5                    | 705                  | 1.20E-05 | 0.00012  |
| GO:0080090 | Process  | regulation of primary metabolic process                                             | 7                    | 1952                 | 1.20E-05 | 0.00012  |
| GO:0010468 | Process  | regulation of gene expression                                                       | 7                    | 2001                 | 1.40E-05 | 0.00013  |
| GO:0031323 | Process  | regulation of cellular metabolic process                                            | 7                    | 2036                 | 1.60E-05 | 0.00014  |
| GO:0060255 | Process  | regulation of macromolecule metabolic process                                       | 7                    | 2060                 | 1.70E-05 | 0.00015  |
| GO:0032501 | Process  | multicellular organismal process                                                    | 7                    | 2094                 | 1.90E-05 | 0.00016  |
| GO:0019222 | Process  | regulation of metabolic process                                                     | 7                    | 2210                 | 2.70E-05 | 0.00022  |
| GO:0006139 | Process  | nucleobase, nucleoside, nucleotide and nucleic acid metabolic process               | 8                    | 3198                 | 3.20E-05 | 0.00025  |
| GO:0006355 | Process  | regulation of transcription, DNA-dependent                                          | 5                    | 987                  | 5.90E-05 | 0.00044  |
| GO:0051252 | Process  | regulation of RNA metabolic process                                                 | 5                    | 996                  | 6.10E-05 | 0.00044  |
| GO:0032774 | Process  | RNA biosynthetic process                                                            | 5                    | 1040                 | 7.50E-05 | 0.00051  |
| GO:0006351 | Process  | transcription, DNA-dependent                                                        | 5                    | 1039                 | 7.50E-05 | 0.00051  |
| GO:0006807 | Process  | nitrogen compound metabolic process                                                 | 8                    | 3826                 | 0.00012  | 0.00077  |
| GO:0009987 | Process  | cellular process                                                                    | 13                   | 11684                | 0.00015  | 0.00095  |
| GO:0050896 | Process  | response to stimulus                                                                | 8                    | 4057                 | 0.00018  | 0.0011   |
| GO:0043170 | Process  | macromolecule metabolic process                                                     | 10                   | 7127                 | 0.0003   | 0.0018   |
| GO:0044238 | Process  | primary metabolic process                                                           | 11                   | 8995                 | 0.0004   | 0.0024   |
| GO:0044249 | Process  | cellular biosynthetic process                                                       | 8                    | 4925                 | 0.00068  | 0.0036   |
| GO:0034645 | Process  | cellular macromolecule biosynthetic process                                         | 7                    | 3661                 | 0.00065  | 0.0036   |
| GO:0009059 | Process  | macromolecule biosynthetic process                                                  | 7                    | 3685                 | 0.00068  | 0.0036   |
| GO:0016070 | Process  | RNA metabolic process                                                               | 5                    | 1657                 | 0.00065  | 0.0036   |
| GO:0048856 | Process  | anatomical structure development                                                    | 5                    | 1726                 | 0.00078  | 0.0041   |
| GO:0044260 | Process  | cellular macromolecule metabolic process                                            | 9                    | 6447                 | 0.0008   | 0.0041   |
| GO:0009058 | Process  | biosynthetic process                                                                | 8                    | 5118                 | 0.00088  | 0.0044   |
| GO:0010467 | Process  | gene expression                                                                     | 7                    | 3962                 | 0.0011   | 0.0051   |
| GO:0007275 | Process  | multicellular organismal development                                                | 5                    | 2020                 | 0.0016   | 0.0076   |
| GO:0044237 | Process  | cellular metabolic process                                                          | 10                   | 8722                 | 0.0016   | 0.0077   |
| GO:0008152 | Process  | metabolic process                                                                   | 11                   | 10614                | 0.0018   | 0.0084   |
| GO:0032502 | Process  | developmental process                                                               | 5                    | 2304                 | 0.0028   | 0.013    |

AGRIGO query using these gene IDs

AT2G25930  
 AT3G46640  
 AT1G12910  
 AT3G22380  
 AT5G61380  
 AT2G18790  
 AT5G35840  
 AT4G18130  
 AT4G16250  
 AT1G09570  
 AT2G32950  
 AT2G46340  
 AT5G43630  
 AT2G16365  
 AT3G13670  
 AT3G19390  
 AT5G10450

Background list contained annotated 37767 genes from TAIR9

**Table S2. Gene ontology enrichment of proteins that co-precipitate with ELF3::ELF3-HFC in the elf3-2 background. AGRIGO website (<http://bioinfo.cau.edu.cn/agriGO/>) output for queried Arabidopsis locus IDs that co-precipitate with ELF3::ELF3-HFC #3.**

| GO term    | Ontology | Description                                                                         | Number in input list | Number in Backgro | p-value  | FDR      |
|------------|----------|-------------------------------------------------------------------------------------|----------------------|-------------------|----------|----------|
| GO:0048511 | Process  | rhythmic process                                                                    | 7                    | 75                | 2.60E-13 | 2.90E-11 |
| GO:0007623 | Process  | circadian rhythm                                                                    | 7                    | 75                | 2.60E-13 | 2.90E-11 |
| GO:0009639 | Process  | response to red or far red light                                                    | 7                    | 210               | 2.60E-10 | 1.40E-08 |
| GO:0010017 | Process  | red or far-red light signaling pathway                                              | 5                    | 41                | 2.50E-10 | 1.40E-08 |
| GO:0009416 | Process  | response to light stimulus                                                          | 8                    | 596               | 1.30E-08 | 5.70E-07 |
| GO:0009314 | Process  | response to radiation                                                               | 8                    | 613               | 1.60E-08 | 5.90E-07 |
| GO:0009628 | Process  | response to abiotic stimulus                                                        | 10                   | 1471              | 8.40E-08 | 2.60E-06 |
| GO:0050789 | Process  | regulation of biological process                                                    | 14                   | 3697              | 1.40E-07 | 3.80E-06 |
| GO:0065007 | Process  | biological regulation                                                               | 14                   | 4188              | 6.60E-07 | 1.60E-05 |
| GO:0009791 | Process  | post-embryonic development                                                          | 7                    | 705               | 8.90E-07 | 2.00E-05 |
| GO:0050794 | Process  | regulation of cellular process                                                      | 12                   | 3375              | 3.20E-06 | 6.40E-05 |
| GO:0045449 | Process  | regulation of transcription                                                         | 9                    | 1802              | 5.50E-06 | 0.0001   |
| GO:0019219 | Process  | regulation of nucleobase, nucleoside, nucleotide and nucleic acid metabolic process | 9                    | 1847              | 6.70E-06 | 0.0001   |
| GO:0031326 | Process  | regulation of cellular biosynthetic process                                         | 9                    | 1881              | 7.70E-06 | 0.0001   |
| GO:0009889 | Process  | regulation of biosynthetic process                                                  | 9                    | 1881              | 7.70E-06 | 0.0001   |
| GO:0051171 | Process  | regulation of nitrogen compound metabolic process                                   | 9                    | 1888              | 8.00E-06 | 0.0001   |
| GO:0010556 | Process  | regulation of macromolecule biosynthetic process                                    | 9                    | 1843              | 6.50E-06 | 0.0001   |
| GO:0006350 | Process  | transcription                                                                       | 9                    | 1923              | 9.20E-06 | 0.00011  |
| GO:0080090 | Process  | regulation of primary metabolic process                                             | 9                    | 1952              | 1.00E-05 | 0.00012  |
| GO:0006139 | Process  | nucleobase, nucleoside, nucleotide and nucleic acid metabolic process               | 11                   | 3198              | 1.30E-05 | 0.00014  |
| GO:0010468 | Process  | regulation of gene expression                                                       | 9                    | 2001              | 1.30E-05 | 0.00014  |
| GO:0031323 | Process  | regulation of cellular metabolic process                                            | 9                    | 2036              | 1.50E-05 | 0.00015  |
| GO:0060255 | Process  | regulation of macromolecule metabolic process                                       | 9                    | 2060              | 1.60E-05 | 0.00015  |
| GO:0032501 | Process  | multicellular organismal process                                                    | 9                    | 2094              | 1.80E-05 | 0.00017  |
| GO:0044260 | Process  | cellular macromolecule metabolic process                                            | 15                   | 6447              | 2.10E-05 | 0.00018  |
| GO:0019222 | Process  | regulation of metabolic process                                                     | 9                    | 2210              | 2.80E-05 | 0.00024  |
| GO:0051716 | Process  | cellular response to stimulus                                                       | 6                    | 840               | 3.80E-05 | 0.00031  |
| GO:0006807 | Process  | nitrogen compound metabolic process                                                 | 11                   | 3826              | 7.10E-05 | 0.00054  |
| GO:0043170 | Process  | macromolecule metabolic process                                                     | 15                   | 7127              | 7.20E-05 | 0.00054  |
| GO:0007242 | Process  | intracellular signaling cascade                                                     | 5                    | 659               | 0.00014  | 0.001    |
| GO:0044237 | Process  | cellular metabolic process                                                          | 16                   | 8722              | 0.00019  | 0.0013   |
| GO:0044238 | Process  | primary metabolic process                                                           | 16                   | 8995              | 0.00028  | 0.0019   |
| GO:0010467 | Process  | gene expression                                                                     | 10                   | 3962              | 0.00049  | 0.0033   |
| GO:0009987 | Process  | cellular process                                                                    | 18                   | 11684             | 0.00053  | 0.0034   |
| GO:0050896 | Process  | response to stimulus                                                                | 10                   | 4057              | 0.0006   | 0.0037   |
| GO:0007275 | Process  | multicellular organismal development                                                | 7                    | 2020              | 0.00069  | 0.0042   |
| GO:0006355 | Process  | regulation of transcription, DNA-dependent                                          | 5                    | 987               | 0.00087  | 0.0051   |
| GO:0051252 | Process  | regulation of RNA metabolic process                                                 | 5                    | 996               | 0.0009   | 0.0052   |
| GO:0032774 | Process  | RNA biosynthetic process                                                            | 5                    | 1040              | 0.0011   | 0.006    |
| GO:0006351 | Process  | transcription, DNA-dependent                                                        | 5                    | 1039              | 0.0011   | 0.006    |
| GO:0034645 | Process  | cellular macromolecule biosynthetic process                                         | 9                    | 3661              | 0.0013   | 0.0067   |
| GO:0009059 | Process  | macromolecule biosynthetic process                                                  | 9                    | 3685              | 0.0013   | 0.0069   |
| GO:0016070 | Process  | RNA metabolic process                                                               | 6                    | 1657              | 0.0014   | 0.0073   |
| GO:0032502 | Process  | developmental process                                                               | 7                    | 2304              | 0.0015   | 0.0075   |
| GO:0008152 | Process  | metabolic process                                                                   | 16                   | 10614             | 0.002    | 0.0097   |
| GO:0007165 | Process  | signal transduction                                                                 | 5                    | 1228              | 0.0023   | 0.011    |
| GO:0044249 | Process  | cellular biosynthetic process                                                       | 10                   | 4925              | 0.0027   | 0.013    |
| GO:0009058 | Process  | biosynthetic process                                                                | 10                   | 5118              | 0.0036   | 0.016    |
| GO:0048856 | Process  | anatomical structure development                                                    | 5                    | 1726              | 0.0095   | 0.043    |

AGRIGO query using these gene IDs

AT2G40080  
AT3G46640  
AT5G59570  
AT3G22380  
AT5G61380  
AT1G12910  
AT1G72630  
AT2G06255  
AT1G17455  
AT1G09340  
AT2G18790  
AT5G35840  
AT4G18130  
AT4G16250  
AT1G09570  
AT2G32950  
AT2G46340  
AT4G11110  
AT3G15354  
AT5G61270  
AT5G43630  
AT2G16365  
AT5G06850  
AT3G42170  
AT3G13670  
AT3G03940  
AT5G18190  
AT2G25760  
AT5G20630

Background list contained annotated 37767 genes from TAIR9

























|                                    |    |                                                                                                                                  |            |                    |           |         |    |    |       |                            |                                     |        |      |      |          |          |
|------------------------------------|----|----------------------------------------------------------------------------------------------------------------------------------|------------|--------------------|-----------|---------|----|----|-------|----------------------------|-------------------------------------|--------|------|------|----------|----------|
| ELF3- <i>hnc</i> <i>phd8</i> nap 2 | 1  | Symbolic: ELF3, PKZ02   Hydroxyproline-rich glycoprotein family protein   chr2:11059459-11061378 FORWARD LENGTH=695              | AT202990.1 | FAM10_20101214.fam | 77,204.80 | 100.00% | 19 | 28 | 35    | 0.21%                      | 38.00% EEDPAFPYVNRG                 | 99.70% | 63.5 | 30.2 | 5.1      | 1,667.79 |
| ELF3- <i>hnc</i> <i>phd8</i> nap 2 | 2  | Symbolic: ELF3, PKZ02   Hydroxyproline-rich glycoprotein family protein   chr2:11059459-11061378 FORWARD LENGTH=695              | AT202990.1 | FAM10_20101214.fam | 77,204.80 | 100.00% | 19 | 28 | 35    | 0.21%                      | 38.00% FQDVPNDGK                    | 99.70% | 67.5 | 29.4 | 4.4      | 1,137.05 |
| ELF3- <i>hnc</i> <i>phd8</i> nap 2 | 3  | Symbolic: ELF3, PKZ02   Hydroxyproline-rich glycoprotein family protein   chr2:11059459-11061378 FORWARD LENGTH=695              | AT202990.1 | FAM10_20101214.fam | 77,204.80 | 100.00% | 19 | 28 | 35    | 0.21%                      | 38.00% FQSDGER                      | 99.70% | 57.2 | 30.1 | 20.9     | 1,144.59 |
| ELF3- <i>hnc</i> <i>phd8</i> nap 2 | 4  | Symbolic: ELF3, PKZ02   Hydroxyproline-rich glycoprotein family protein   chr2:11059459-11061378 FORWARD LENGTH=695              | AT202990.1 | FAM10_20101214.fam | 77,204.80 | 100.00% | 19 | 28 | 35    | 0.21%                      | 38.00% LKQKAAK                      | 99.00% | 57.8 | 29.1 | 13       | 812.416  |
| ELF3- <i>hnc</i> <i>phd8</i> nap 2 | 5  | Symbolic: ELF3, PKZ02   Hydroxyproline-rich glycoprotein family protein   chr2:11059459-11061378 FORWARD LENGTH=695              | AT202990.1 | FAM10_20101214.fam | 77,204.80 | 100.00% | 19 | 28 | 35    | 0.21%                      | 38.00% LPHNDGAK                     | 99.00% | 57.7 | 27   | 26       | 911.482  |
| ELF3- <i>hnc</i> <i>phd8</i> nap 2 | 6  | Symbolic: ELF3, PKZ02   Hydroxyproline-rich glycoprotein family protein   chr2:11059459-11061378 FORWARD LENGTH=695              | AT202990.1 | FAM10_20101214.fam | 77,204.80 | 100.00% | 19 | 28 | 35    | 0.21%                      | 38.00% LKQKAAK                      | 99.70% | 43.6 | 26.7 | 23.1     | 2,734.86 |
| ELF3- <i>hnc</i> <i>phd8</i> nap 2 | 7  | Symbolic: ELF3, PKZ02   Hydroxyproline-rich glycoprotein family protein   chr2:11059459-11061378 FORWARD LENGTH=695              | AT202990.1 | FAM10_20101214.fam | 77,204.80 | 100.00% | 19 | 28 | 35    | 0.21%                      | 38.00% LKASQKLLLEKPKLQK             | 99.70% | 85.9 | 25   | 83.6     | 1,312.08 |
| ELF3- <i>hnc</i> <i>phd8</i> nap 2 | 8  | Symbolic: ELF3, PKZ02   Hydroxyproline-rich glycoprotein family protein   chr2:11059459-11061378 FORWARD LENGTH=695              | AT202990.1 | FAM10_20101214.fam | 77,204.80 | 100.00% | 19 | 28 | 35    | 0.21%                      | 38.00% LKQKAAK                      | 99.70% | 51   | 27.8 | 24.6     | 2,408.52 |
| ELF3- <i>hnc</i> <i>phd8</i> nap 2 | 9  | Symbolic: ELF3, PKZ02   Hydroxyproline-rich glycoprotein family protein   chr2:11059459-11061378 FORWARD LENGTH=695              | AT202990.1 | FAM10_20101214.fam | 77,204.80 | 100.00% | 19 | 28 | 35    | 0.21%                      | 38.00% LKQKAAK                      | 99.70% | 86.1 | 28.5 | 78.6     | 1,978.75 |
| ELF3- <i>hnc</i> <i>phd8</i> nap 2 | 10 | Symbolic: ELF3, PKZ02   Hydroxyproline-rich glycoprotein family protein   chr2:11059459-11061378 FORWARD LENGTH=695              | AT202990.1 | FAM10_20101214.fam | 77,204.80 | 100.00% | 19 | 28 | 35    | 0.21%                      | 38.00% LKQKAAK                      | 99.70% | 32.9 | 30.7 | 23.9     | 1,551.76 |
| ELF3- <i>hnc</i> <i>phd8</i> nap 2 | 11 | Symbolic: ELF3, PKZ02   Hydroxyproline-rich glycoprotein family protein   chr2:11059459-11061378 FORWARD LENGTH=695              | AT202990.1 | FAM10_20101214.fam | 77,204.80 | 100.00% | 19 | 28 | 35    | 0.21%                      | 38.00% NLYVQKGGKAAKATGK             | 99.70% | 117  | 30.9 | 13.1     | 1,612.04 |
| ELF3- <i>hnc</i> <i>phd8</i> nap 2 | 12 | Symbolic: ELF3, PKZ02   Hydroxyproline-rich glycoprotein family protein   chr2:11059459-11061378 FORWARD LENGTH=695              | AT202990.1 | FAM10_20101214.fam | 77,204.80 | 100.00% | 19 | 28 | 35    | 0.21%                      | 38.00% GQSDSPSPDQSDGK               | 99.70% | 64.6 | 29.1 | 5.6      | 1,614.77 |
| ELF3- <i>hnc</i> <i>phd8</i> nap 2 | 13 | Symbolic: ELF3, PKZ02   Hydroxyproline-rich glycoprotein family protein   chr2:11059459-11061378 FORWARD LENGTH=695              | AT202990.1 | FAM10_20101214.fam | 77,204.80 | 100.00% | 19 | 28 | 35    | 0.21%                      | 38.00% QVNSLQKQVPRV                 | 99.70% | 68.9 | 30.2 | 5.1      | 1,661.81 |
| ELF3- <i>hnc</i> <i>phd8</i> nap 2 | 14 | Symbolic: ELF3, PKZ02   Hydroxyproline-rich glycoprotein family protein   chr2:11059459-11061378 FORWARD LENGTH=695              | AT202990.1 | FAM10_20101214.fam | 77,204.80 | 100.00% | 19 | 28 | 35    | 0.21%                      | 38.00% SDNFAKQDQDQFKTK              | 99.70% | 58.7 | 28.8 | 48.7     | 1,699.79 |
| ELF3- <i>hnc</i> <i>phd8</i> nap 2 | 15 | Symbolic: ELF3, PKZ02   Hydroxyproline-rich glycoprotein family protein   chr2:11059459-11061378 FORWARD LENGTH=695              | AT202990.1 | FAM10_20101214.fam | 77,204.80 | 100.00% | 19 | 28 | 35    | 0.21%                      | 38.00% QPFFKAAQGGDNNAAKTTTITTTTTT   | 99.70% | 64.6 | 31.1 | 5.3      | 1,315.23 |
| ELF3- <i>hnc</i> <i>phd8</i> nap 2 | 16 | Symbolic: ELF3, PKZ02   Hydroxyproline-rich glycoprotein family protein   chr2:11059459-11061378 FORWARD LENGTH=695              | AT202990.1 | FAM10_20101214.fam | 77,204.80 | 100.00% | 19 | 28 | 35    | 0.21%                      | 38.00% DVNLTFLVPPSGQSDQVDR          | 99.70% | 65.1 | 30.5 | 6.1      | 2,224.04 |
| ELF3- <i>hnc</i> <i>phd8</i> nap 2 | 17 | Symbolic: ELF3, PKZ02   Hydroxyproline-rich glycoprotein family protein   chr2:11059459-11061378 FORWARD LENGTH=695              | AT202990.1 | FAM10_20101214.fam | 77,204.80 | 100.00% | 19 | 28 | 35    | 0.21%                      | 38.00% TTVVETTR                     | 99.00% | 50   | 28   | 40.8     | 907.464  |
| ELF3- <i>hnc</i> <i>phd8</i> nap 2 | 18 | Symbolic: ELF3, PKZ02   Hydroxyproline-rich glycoprotein family protein   chr2:11059459-11061378 FORWARD LENGTH=695              | AT202990.1 | FAM10_20101214.fam | 77,204.80 | 100.00% | 19 | 28 | 35    | 0.21%                      | 38.00% VFKQLTVLR                    | 99.70% | 39.4 | 28.7 | 23.6     | 1,392.76 |
| ELF3- <i>hnc</i> <i>phd8</i> nap 2 | 19 | Symbolic: ELF3, PKZ02   Hydroxyproline-rich glycoprotein family protein   chr2:11059459-11061378 FORWARD LENGTH=695              | AT202990.1 | FAM10_20101214.fam | 77,204.80 | 100.00% | 19 | 28 | 35    | 0.21%                      | 38.00% NQVQNKALR                    | 99.70% | 73.1 | 36.2 | 16.2     | 1,915.52 |
| ELF3- <i>hnc</i> <i>phd8</i> nap 2 | 20 | Symbolic: ELF3, PKZ02   Hydroxyproline-rich glycoprotein family protein   chr2:11059459-11061378 FORWARD LENGTH=695              | AT204000.1 | FAM10_20101214.fam | 12,375.40 | 100.00% | 4  | 8  | 12    | 0.07%                      | 60.40% NNVALEAGQSDPAAWVNLDR         | 99.70% | 70.6 | 25.7 | 64.0     | 2,314.98 |
| ELF3- <i>hnc</i> <i>phd8</i> nap 2 | 21 | Symbolic: ELF3, PKZ02   Hydroxyproline-rich glycoprotein family protein   chr2:11059459-11061378 FORWARD LENGTH=695              | AT204000.1 | FAM10_20101214.fam | 12,375.40 | 100.00% | 4  | 8  | 12    | 0.07%                      | 60.40% NNVALEAGQSDPAAWVNLDR         | 99.70% | 306  | 28.6 | 8.2      | 1,514.82 |
| ELF3- <i>hnc</i> <i>phd8</i> nap 2 | 22 | Symbolic: ELF3, PKZ02   Hydroxyproline-rich glycoprotein family protein   chr2:11059459-11061378 FORWARD LENGTH=695              | AT204000.1 | FAM10_20101214.fam | 12,375.40 | 100.00% | 4  | 8  | 12    | 0.07%                      | 60.40% LKQKAAKNGKAR                 | 99.70% | 55.3 | 30.4 | 47.4     | 1,538.77 |
| ELF3- <i>hnc</i> <i>phd8</i> nap 2 | 23 | Symbolic: ELF3, PKZ02   Hydroxyproline-rich glycoprotein family protein   chr2:11059459-11061378 FORWARD LENGTH=695              | AT204000.1 | FAM10_20101214.fam | 12,375.40 | 100.00% | 4  | 8  | 12    | 0.07%                      | 60.40% VNNVQKGLVDFVPSGSGK           | 99.70% | 56.3 | 29.4 | 48.1     | 2,162.98 |
| ELF3- <i>hnc</i> <i>phd8</i> nap 2 | 24 | Symbolic: ELF3, PKZ02   Hydroxyproline-rich glycoprotein family protein   chr2:11059459-11061378 FORWARD LENGTH=695              | AT204000.1 | FAM10_20101214.fam | 12,375.40 | 100.00% | 1  | 2  | 6     | 0.04%                      | 18.00% LKQKAAK                      | 99.70% | 17.2 | 24.4 | 2.4      | 1,025.54 |
| ELF3- <i>hnc</i> <i>phd8</i> nap 2 | 25 | Symbolic: PCL1, LUX   Homodomain-like superfamily protein   chr3:17381248-1738219 FORWARD LENGTH=923                             | AT204664.1 | LAT304664.0        | 18,648.50 | 100.00% | 2  | 2  | 6     | 0.04%                      | 18.00% PVDVHARLQK                   | 99.70% | 32.8 | 25   | 51.6     | 1,197.70 |
| ELF3- <i>hnc</i> <i>phd8</i> nap 2 | 26 | Symbolic: PCL1, LUX   Homodomain-like superfamily protein   chr3:17381248-1738219 FORWARD LENGTH=923                             | AT204664.1 | LAT304664.0        | 18,648.50 | 100.00% | 1  | 2  | 6     | 0.04%                      | 18.00% GGGGPPNNSNNWVEEIVDRSSSSSSGSK | 99.70% | 80   | 27   | 0        | 3,028.27 |
| ELF3- <i>hnc</i> <i>phd8</i> nap 2 | 27 | Symbolic: PCL1, LUX   Homodomain-like superfamily protein   chr3:17381248-1738219 FORWARD LENGTH=923                             | AT204664.1 | LAT304664.0        | 18,648.50 | 100.00% | 1  | 2  | 6     | 0.04%                      | 18.00% LKQKAAK                      | 99.70% | 65.8 | 25.4 | 27.4     | 2,271.95 |
| ELF3- <i>hnc</i> <i>phd8</i> nap 2 | 28 | Symbolic: TIC   Time for caffeine   chr3:7913181-7913879 FORWARD LENGTH=150                                                      | AT202280.1 | LAT302280.2        | 16,449.80 | 100.00% | 4  | 4  | 5     | 0.03%                      | 4.13% ENAKDHFVQKSDPSTDR             | 99.70% | 54.3 | 26.4 | 43.6     | 1,317.63 |
| ELF3- <i>hnc</i> <i>phd8</i> nap 2 | 29 | Symbolic: TIC   Time for caffeine   chr3:7913181-7913879 FORWARD LENGTH=150                                                      | AT202280.1 | LAT302280.2        | 16,449.80 | 100.00% | 4  | 4  | 5     | 0.03%                      | 4.13% NQSDQFKT                      | 99.70% | 30.9 | 29   | 19.1     | 1,330.22 |
| ELF3- <i>hnc</i> <i>phd8</i> nap 2 | 30 | Symbolic: TIC   Time for caffeine   chr3:7913181-7913879 FORWARD LENGTH=150                                                      | AT202280.1 | LAT302280.2        | 16,449.80 | 100.00% | 4  | 4  | 5     | 0.03%                      | 4.13% SGGSGGKGLDQSPVTR              | 99.70% | 65.1 | 31.3 | 56.3     | 1,979.99 |
| ELF3- <i>hnc</i> <i>phd8</i> nap 2 | 31 | Symbolic: TIC   Time for caffeine   chr3:7913181-7913879 FORWARD LENGTH=150                                                      | AT202280.1 | LAT302280.2        | 16,449.80 | 100.00% | 4  | 4  | 5     | 0.03%                      | 4.13% GEAADKDFEAK                   | 99.70% | 53.7 | 28.3 | 44.9     | 1,917.63 |
| ELF3- <i>hnc</i> <i>phd8</i> nap 2 | 32 | Symbolic: TIC   Time for caffeine   chr3:7913181-7913879 FORWARD LENGTH=150                                                      | AT202280.1 | LAT302280.2        | 16,449.80 | 100.00% | 4  | 4  | 5     | 0.03%                      | 4.13% SGGSGGKGLDQSPVTR              | 99.70% | 60.9 | 30.9 | 19.1     | 1,979.99 |
| ELF3- <i>hnc</i> <i>phd8</i> nap 2 | 33 | Symbolic: TOCA, APR1, PRL1, AT2OC1   C/EBP motif-containing response regulator protein   chr5:2467540-2467876 FORWARD LENGTH=638 | AT206180.1 | FAM10_20101214.fam | 69,269.40 | 100.00% | 3  | 3  | 4     | 0.02%                      | 7.28% FQVNSAGSKPK                   | 99.70% | 42.4 | 29.5 | 31.5     | 2,449.60 |
| ELF3- <i>hnc</i> <i>phd8</i> nap 2 | 34 | Symbolic: TOCA, APR1, PRL1, AT2OC1   C/EBP motif-containing response regulator protein   chr5:2467540-2467876 FORWARD LENGTH=638 | AT206180.1 | FAM10_20101214.fam | 69,269.40 | 100.00% | 3  | 3  | 4     | 0.02%                      | 7.28% GNSHQKNEVSWATPAPHAR           | 99.70% | 41.7 | 31.2 | 34       | 2,209.26 |
| ELF3- <i>hnc</i> <i>phd8</i> nap 2 | 35 | Symbolic: TOCA, APR1, PRL1, AT2OC1   C/EBP motif-containing response regulator protein   chr5:2467540-2467876 FORWARD LENGTH=638 | AT206180.1 | FAM10_20101214.fam | 69,269.40 | 100.00% | 3  | 3  | 4     | 0.02%                      | 7.28% NQVQNKALR                     | 99.70% | 42.4 | 29.5 | 31.5     | 2,449.60 |
| GRF- <i>hnc</i> <i>Col</i> nap 1   | 1  | Symbolic: ELF4   Protein of unknown function [DFP13131]   chr2:16784548-16784880 REVERSE LENGTH=111                              | AT204000.1 | FAM10_20101214.fam | 12,375.40 | 100.00% | 6  | 7  | 20    | 0.04%                      | 30.00% NNVALEAGQSDPAAWVNLDR         | 99.70% | 84.2 | 27.2 | 70.7     | 1,515.84 |
| GRF- <i>hnc</i> <i>Col</i> nap 1   | 2  | Symbolic: ELF4   Protein of unknown function [DFP13131]   chr2:16784548-16784880 REVERSE LENGTH=111                              | AT204000.1 | FAM10_20101214.fam | 12,375.40 | 100.00% | 2  | 6  | 7     | 0.02%                      | 30.00% VNNVQKGLVDFVPSGSGK           | 99.70% | 87.1 | 30.1 | 81.1     | 2,146.99 |
| GRF- <i>hnc</i> <i>Col</i> nap 1   | 3  | Symbolic: PVE1   Phytochrome E 1   chr8:10042112-10042848 REVERSE LENGTH=112                                                     | AT648130.1 | FAM10_20101214.fam | 12,213.10 | 100.00% | 4  | 6  | 0.03% | 3.87% NNVALEAGQSDPAAWVNLDR | 99.70%                              | 101    | 31.5 | 101  | 2,566.23 |          |
| GRF- <i>hnc</i> <i>Col</i> nap 1   | 4  | Symbolic: PVE1   Phytochrome E 1   chr8:10042112-10042848 REVERSE LENGTH=112                                                     | AT648130.1 | FAM10_20101214.fam | 12,213.10 | 100.00% | 2  | 4  | 6     | 0.03%                      | 3.87% NNVALEAGQSDPAAWVNLDR          | 99.70% | 173  | 30.5 | 143      | 2,280.08 |
| GRF- <i>hnc</i> <i>Col</i> nap 1   | 5  | Symbolic: ELF4   Protein of unknown function [DFP13131]   chr2:16784548-16784880 REVERSE LENGTH=111                              | AT204000.1 | FAM10_20101214.fam | 12,375.40 | 100.00% | 3  | 8  | 21    | 0.11%                      | 48.00% NNVALEAGQSDPAAWVNLDR         | 99.70% | 77.1 | 25.1 | 77.1     | 2,319.98 |
| GRF- <i>hnc</i> <i>Col</i> nap 2   | 1  | Symbolic: ELF4   Protein of unknown function [DFP13131]   chr2:16784548-16784880 REVERSE LENGTH=111                              | AT204000.1 | FAM10_20101214.fam | 12,375.40 | 100.00% | 3  | 8  | 21    | 0.11%                      | 48.00% NNVALEAGQSDPAAWVNLDR         | 99.70% | 132  | 27.2 | 127      | 1,512.84 |
| GRF- <i>hnc</i> <i>Col</i> nap 2   | 2  | Symbolic: ELF4   Protein of unknown function [DFP13131]   chr2:16784548-16784880 REVERSE LENGTH=111                              | AT204000.1 | FAM10_20101214.fam | 12,375.40 | 100.00% | 4  | 8  | 21    | 0.11%                      | 48.00% VNNVQKGLVDFVPSGSGK           | 99.70% | 99.4 | 29.4 | 97.4     | 2,162.08 |
| GRF- <i>hnc</i> <i>Col</i> nap 2   | 3  | Symbolic: ELF4   Protein of unknown function [DFP13131]   chr2:16784548-16784880 REVERSE LENGTH=111                              | AT204000.1 | FAM10_20101214.fam | 12,375.40 | 100.00% | 4  | 10 | 28    | 0.15%                      | 49.50% NNVALEAGQSDPAAWVNLDR         | 99.70% | 89.1 | 26.6 | 89.1     | 2,302.99 |
| GRF- <i>hnc</i> <i>Col</i> nap 2   | 4  | Symbolic: ELF4   Protein of unknown function [DFP13131]   chr2:16784548-16784880 REVERSE LENGTH=111                              | AT204000.1 | FAM10_20101214.fam | 12,375.40 | 100.00% | 4  | 10 | 28    | 0.15%                      | 49.50% NNVALEAGQSDPAAWVNLDR         | 99.70% | 107  | 27.2 | 96.6     | 1,512.84 |
| GRF- <i>hnc</i> <i>Col</i> nap 2   | 5  | Symbolic: ELF4   Protein of unknown function [DFP13131]   chr2:16784548-16784880 REVERSE LENGTH=111                              | AT204000.1 | FAM10_20101214.fam | 12,375.40 | 100.00% | 4  | 10 | 28    | 0.15%                      | 49.50% NNVALEAGQSDPAAWVNLDR         | 99.10% | 109  | 28.6 | 10.9     | 2,460.07 |
| GRF- <i>hnc</i> <i>Col</i> nap 2   | 6  | Symbolic: ELF4   Protein of unknown function [DFP13131]   chr2:16784548-16784880 REVERSE LENGTH=111                              | AT204000.1 | FAM10_20101214.fam | 12,375.40 | 100.00% | 4  | 10 | 28    | 0.15%                      | 49.50% VNNVQKGLVDFVPSGSGK           | 99.70% | 100  | 29.7 | 109.2    | 2,146.99 |

# Supplementary Figure S1



# Supplementary Figure S2



## Supplementary Figure S3



# Supplementary Figure S4



# Supplementary Figure S5

A.



B.



C.



D.



# Supplementary Figure S6
